# Supplementary material for: Evaluation of 3β-hydroxysteroid dehydrogenase activity using progesterone and androgen receptors-mediated transactivation
Source: PubMed Central journal article supplement (PMC11479897; doi:10.3389/fendo.2024.1480722), 2024-10-02
Supplement: DataSheet1.pdf [file DataSheet1.pdf]

**Supplementary Table 1.** Primers used in mutagenesis of HSD3B2 gene. Small letters indicate the substituted base sequence.

| <b>PCR primers</b> | <b>Forward primers</b>       | <b>Reverse primers</b>       |
|--------------------|------------------------------|------------------------------|
| human HSD3B2-C72R  | F- CTGAAAAGAGCCcGCCAGGACGTCT | R- AGACGTCCTGGCgGGCTCTTTTCAG |
| human HSD3B2-S124G | F- TTCATCTACACCgGTAGCATAGAGG | R- CCTCTATGCTACcGGTGTAGATGAA |
| human HSD3B2-V225D | F- ACCCAGTCTATGaTGGCAACGTGGC | R- GCCACGTTGCCAtCATAGACTGGGT |
| human HSD3B2-V299I | F- CTGCTGGAAGTAaTGAGCTTCCTAC | R- GTAGGAAGCTCAfTACTTCCAGCAG |

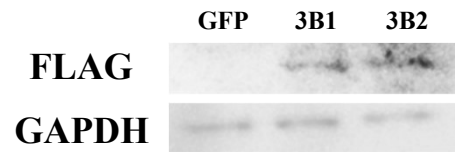

**Supplementary Figure 1. Expression of FLAG-tagged human HSD3B1 and HSD3B2 in each gene-transfected HEK293 cells.** Western blot analyses were performed with the antibodies against FLAG and GAPDH using lysates derived from GFP-, HSD3B1- or HSD3B2-introduced HEK293 cells.

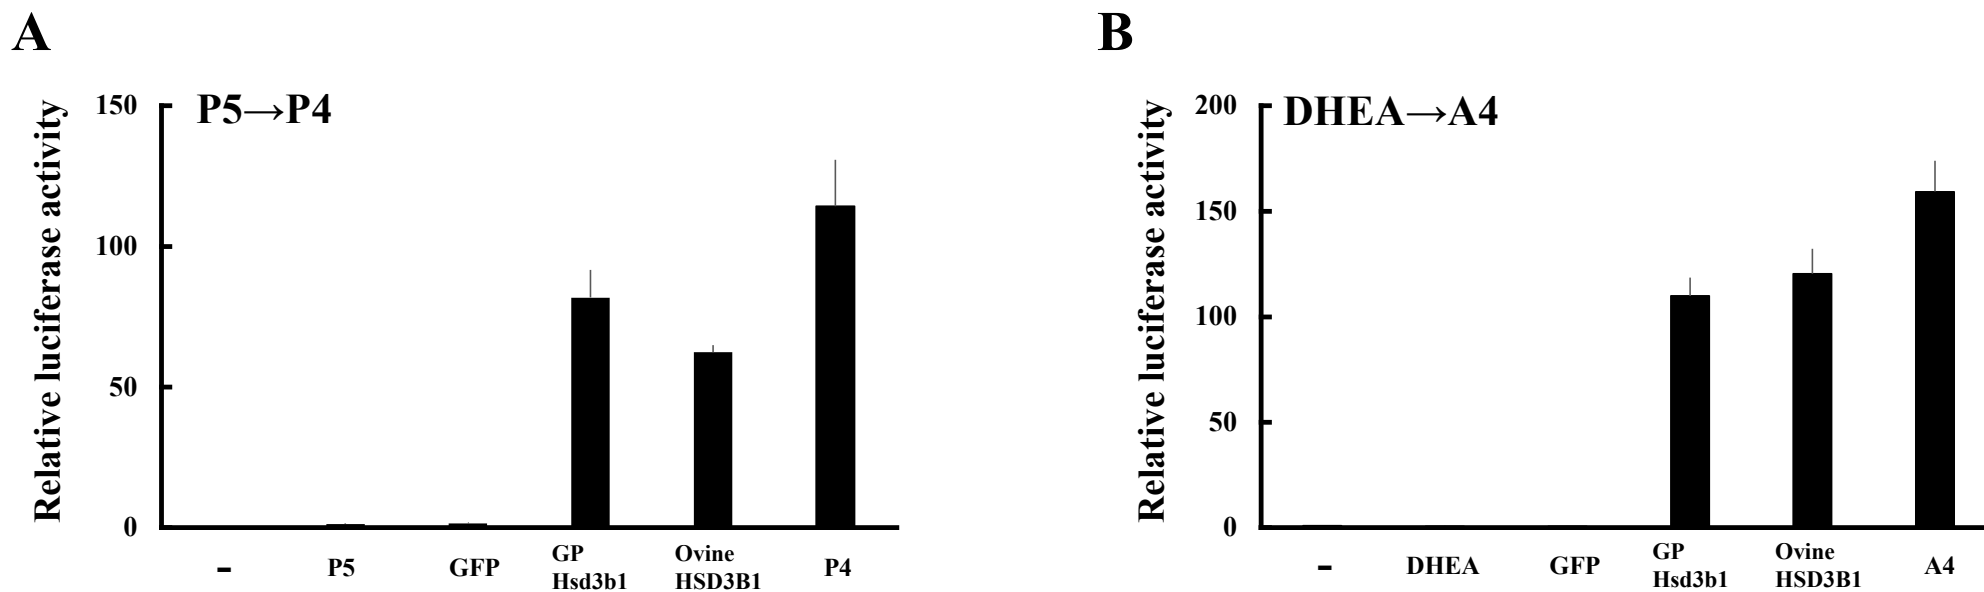

**Supplementary Figure 2. Evaluation of the enzymatic activities of guinea pig (GP) Hsd3b1 and ovine HSD3B1 using culture media from each gene-transfected HEK293 cells.** Activation of human PR- and AR-mediated transcription by HSD3B1 and HSD3B2 using culture media from each gene-transfected HEK293 cells. CV-1 cells were transfected with PRE-Luc/ human PR-expression vectors (A) and ARE-Luc/ human AR-expression vectors (B). At 24 h post-transfection, cells were incubated for 24 h with vehicle (lane C), P5 (10 nM), P4 (10 nM), DHEA (10 nM), A4 (10 nM), culture medium from GFP or each HSD3B-expressing HEK293 cells collected at 2 h and 3 h after addition of P5 (10 nM) and DHEA (10 nM), respectively. Values of the vehicle were defined as 1. Data represent the mean  $\pm$  SEM of at least four independent experiments.
